# Supplementary material
Source: PubMed Central journal article supplement (PMC7332647)
Supplement: mmc1.pdf [file mmc1.pdf]

## Supplemental Data

### Genome-wide Enrichment of *De Novo* Coding Mutations

#### in Orofacial Cleft Trios

Madison R. Bishop, Kimberly K. Diaz Perez, Miranda Sun, Samantha Ho, Pankaj Chopra, Nandita Mukhopadhyay, Jacqueline B. Hetmanski, Margaret A. Taub, Lina M. Moreno-Urbe, Luz Consuelo Valencia-Ramirez, Claudia P. Restrepo Muñeton, George Wehby, Jacqueline T. Hecht, Frederic Deleyiannis, Seth M. Weinberg, Yah Huei Wu-Chou, Philip K. Chen, Harrison Brand, Michael P. Epstein, Ingo Ruczinski, Jeffrey C. Murray, Terri H. Beaty, Eleanor Feingold, Robert J. Lipinski, David J. Cutler, Mary L. Marazita, and Elizabeth J. Leslie

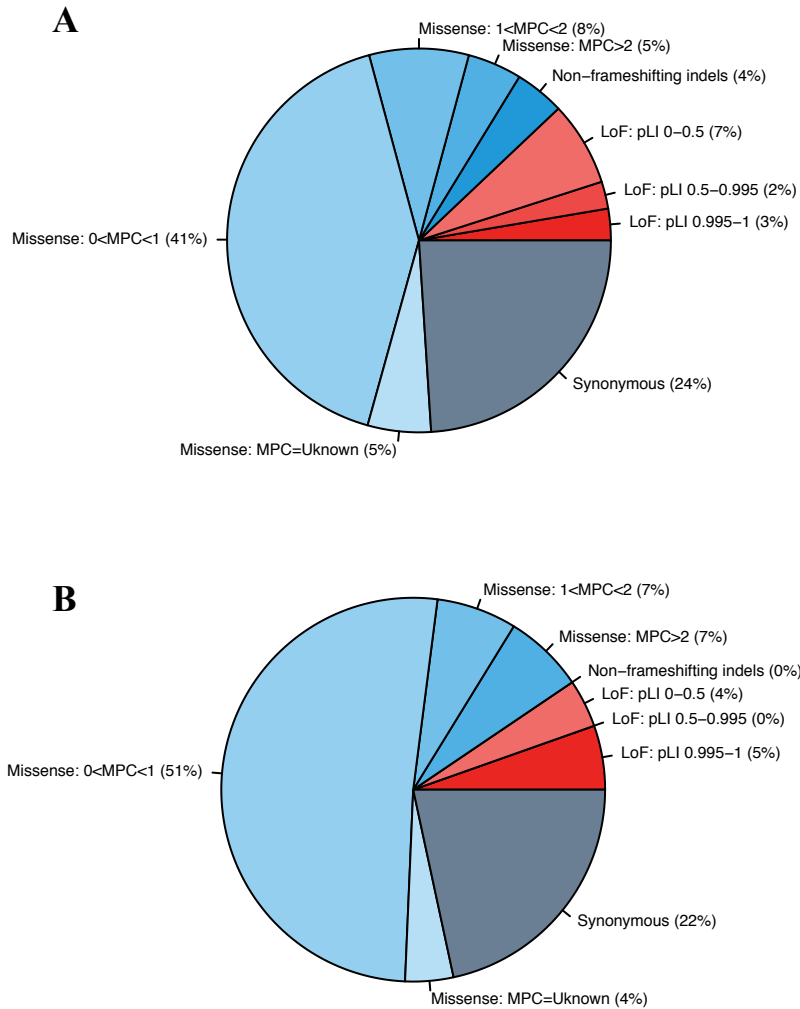

**Figure S1. Distribution of DNMs by variant class by cleft subtype. (A)** Distribution of rare, coding DNMs by variant class for CL/P trios. **(B)** Distribution of rare, coding DNMs by variant class for CP only trios.

DNMs were subcategorized by MPC score (missense) or pLI score (LoF).

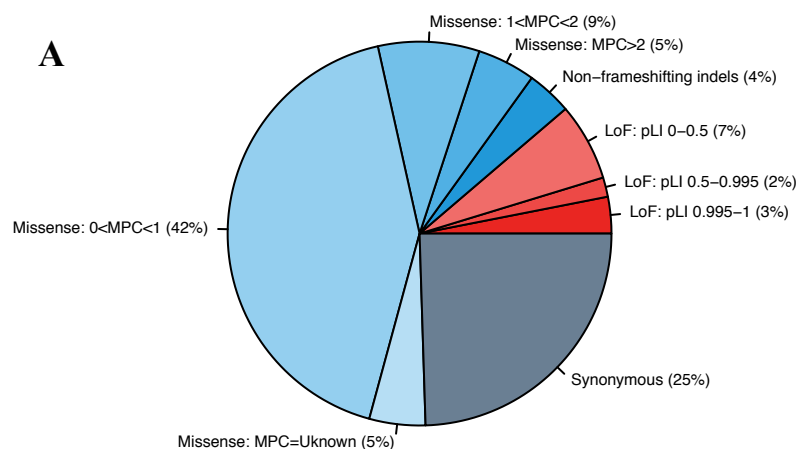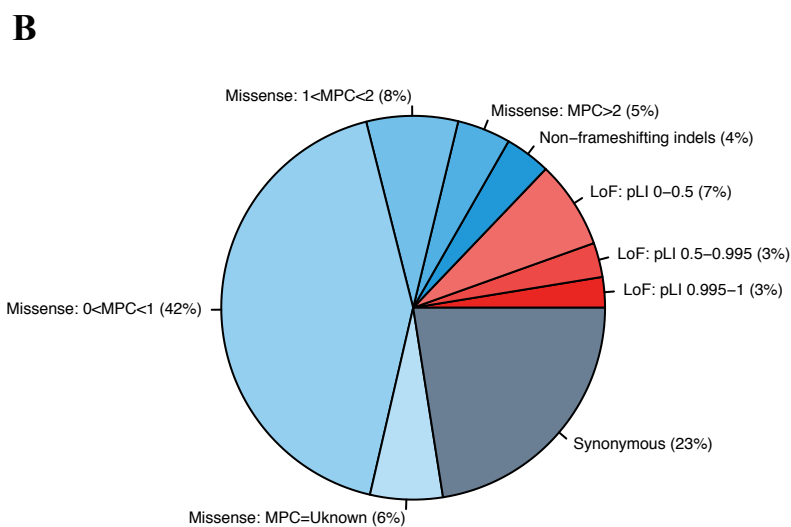

**Figure S2. Distribution of DNMs by variant class by sex. (A)** Distribution of rare, coding DNMs by variant class for male probands with any OFC. **(B)** Distribution of rare, coding DNMs by variant class for female probands with any OFC. DNMs were subcategorized by MPC score (missense) or pLI score (LoF)

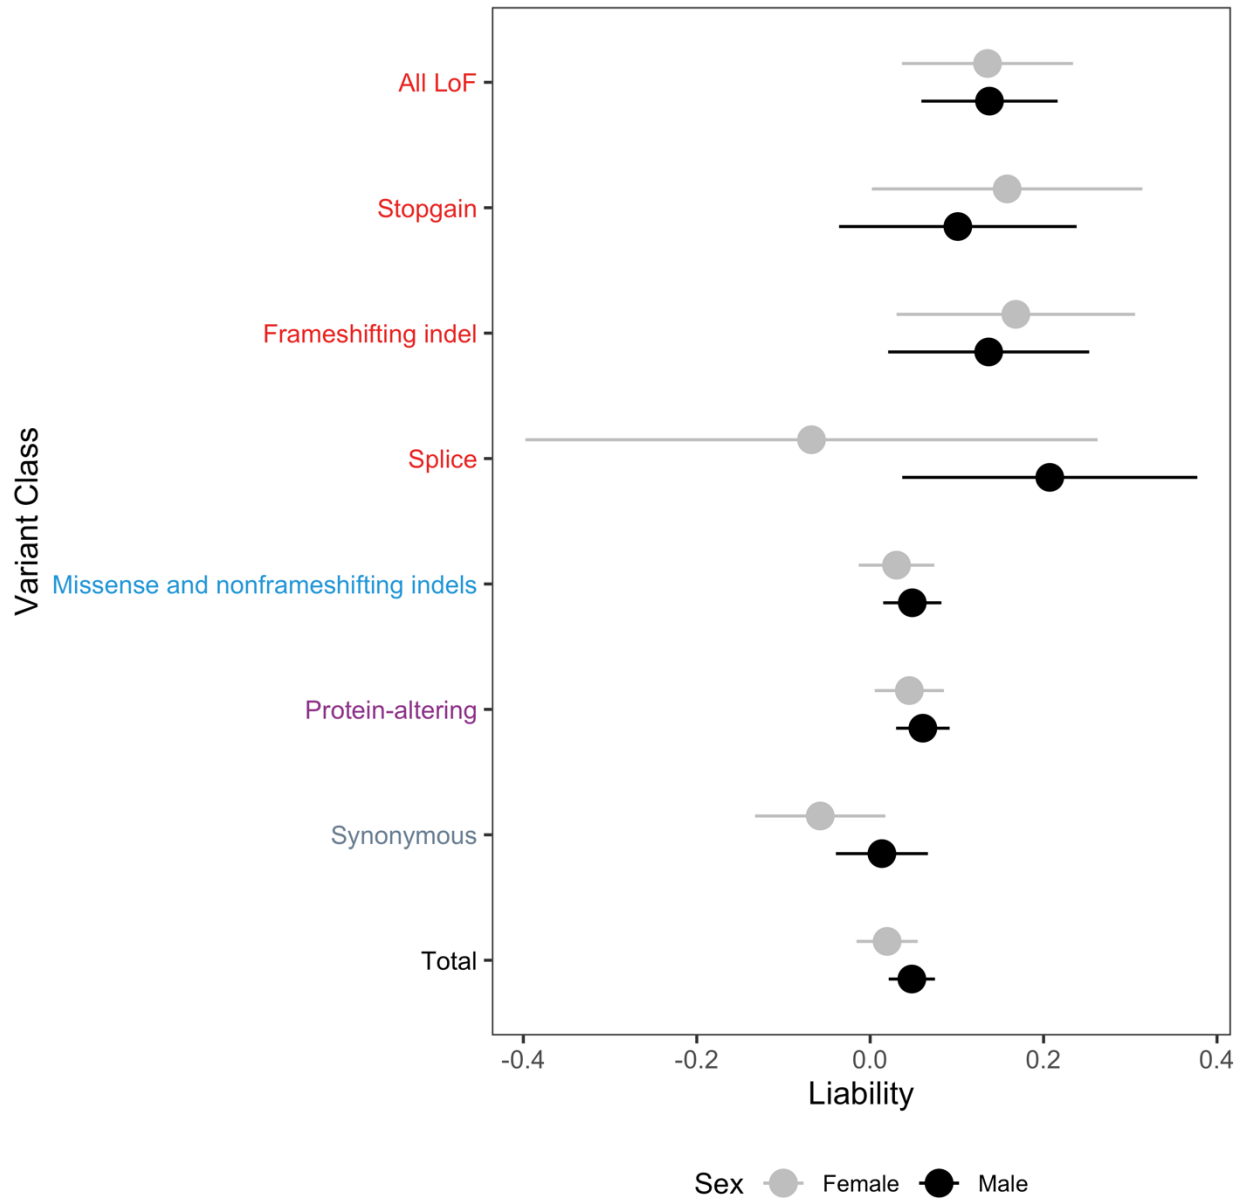

**Figure S3. Liability of DNMs by variant class by sex.** Comparison of the number of DNMs by variant type between males and females on the liability scale.

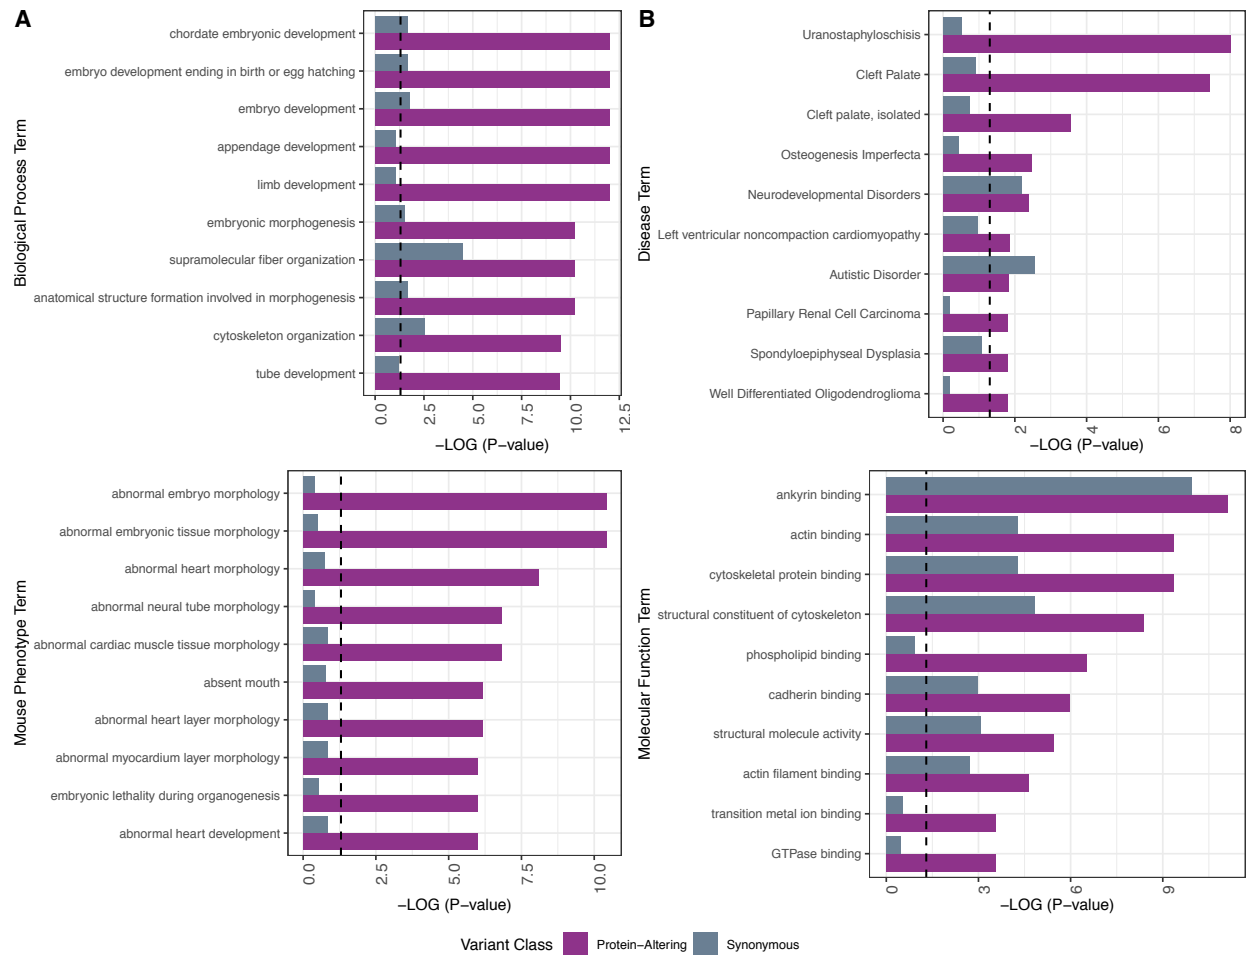

**Figure S4. Gene set enrichment analysis for DNMs by variant class in all OFCs.** Gene set enrichment analysis for all OFC for genes with protein-altering (purple) or synonymous (grey) DNMs. The dashed line represents a significance threshold of  $p$ -value=0.05. **(A)** P-values for genes with synonymous DNMs and protein-altering DNMs for the top ten most significant biological process terms (top) and mouse phenotype terms (bottom) for genes with protein-altering DNMs. **(B)** P-values for genes with synonymous DNMs and protein-altering DNMs for the top ten most significant disease terms (top) and molecular function terms (bottom) for genes with protein-altering DNMs.

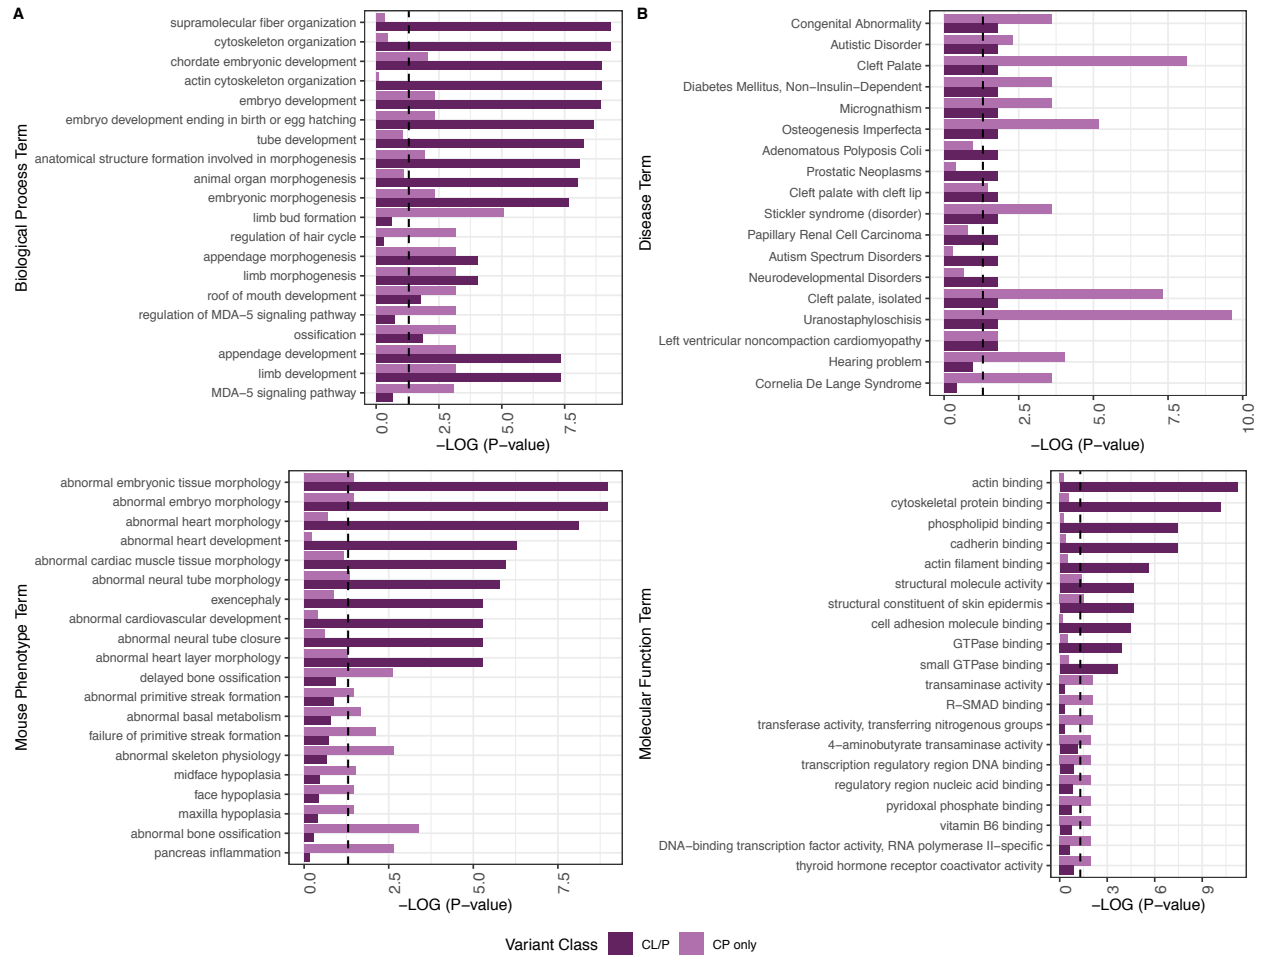

**Figure S5. Gene set enrichment analysis for protein-altering DNMs by cleft subtype.** Gene set enrichment analysis for genes with protein-altering DNMs in the CL/P trios (dark purple) and the CP only trios (light purple). **(A)** P-values for the top ten most significant biological process terms (top) and mouse phenotype terms (bottom) for genes with protein-altering DNMs in CL/P and CP only trios. **(B)** P-values for the top ten most significant disease terms (top) and molecular function terms (bottom) for genes with protein-altering DNMs in CL/P and CP only trios.

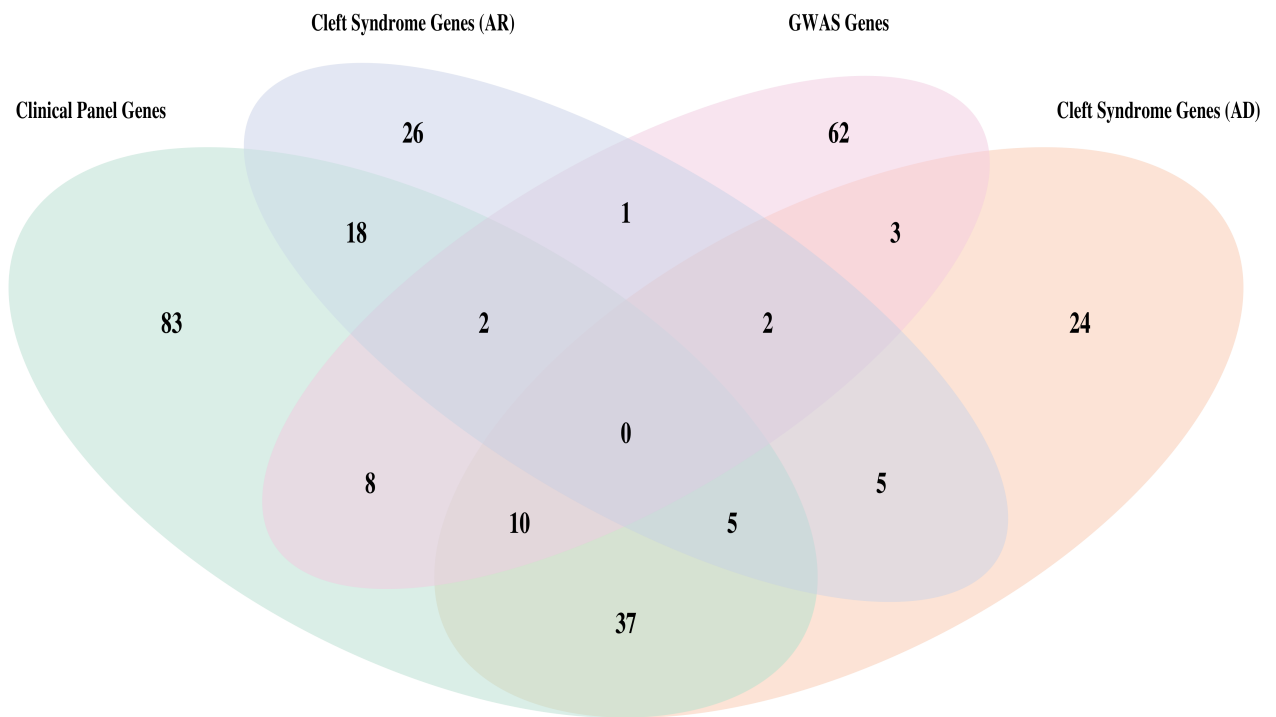

**Figure S6. Gene list summaries for clinically-relevant OFC genes.** Venn diagram showing the number of genes in each clinically relevant gene set list.

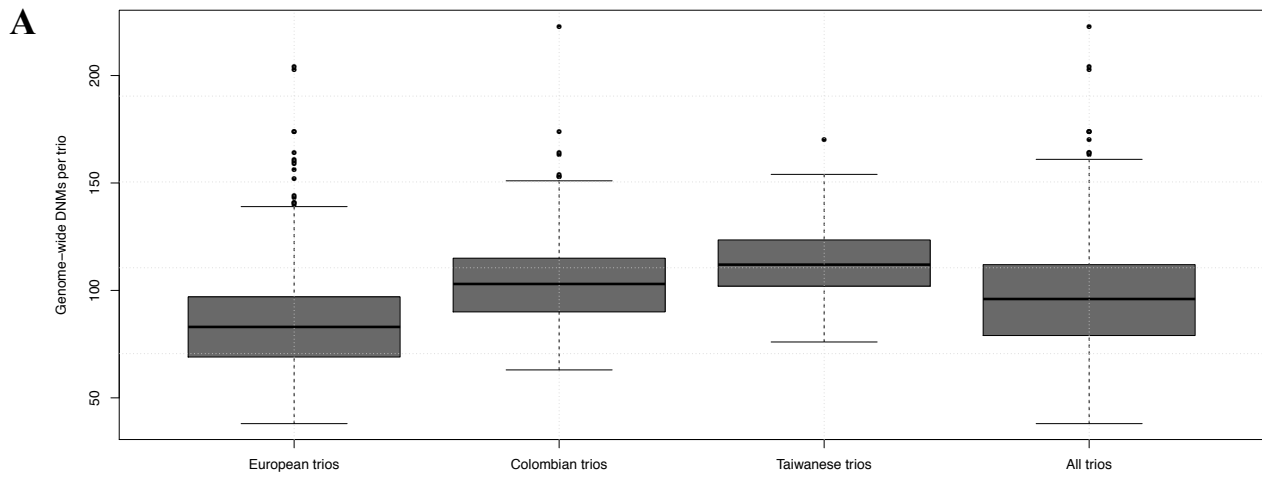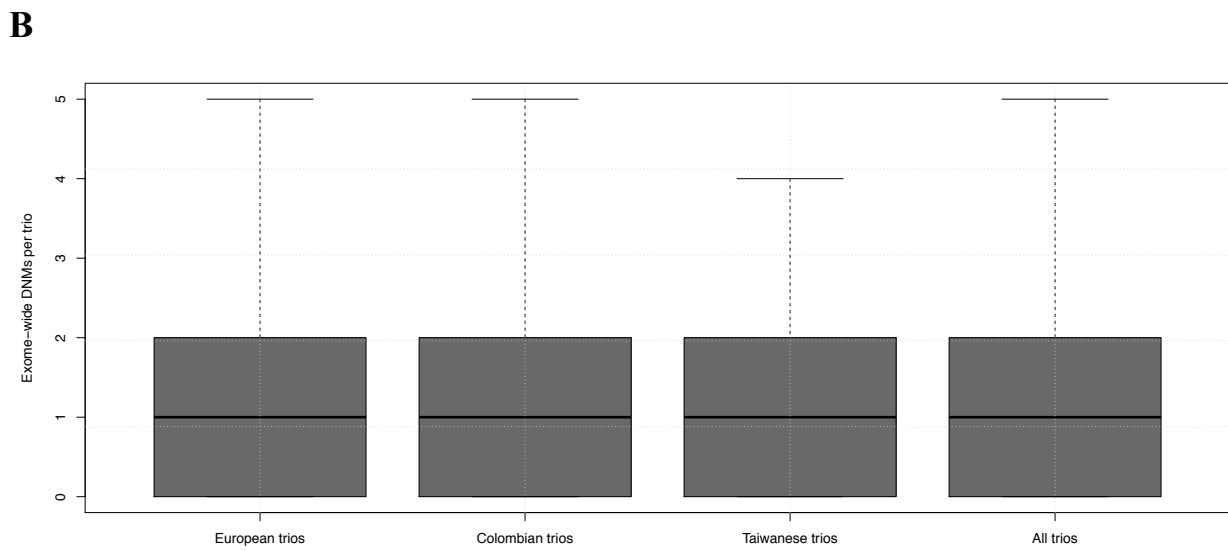

**Figure S7. Number of DNMs per trio by ethnicity. (A)** Genome-wide DNMs per trio for European, Colombian, Taiwanese, and All trios. **(B)** Exome-wide DNMs per trio for European, Colombian, Taiwanese, and All trios.



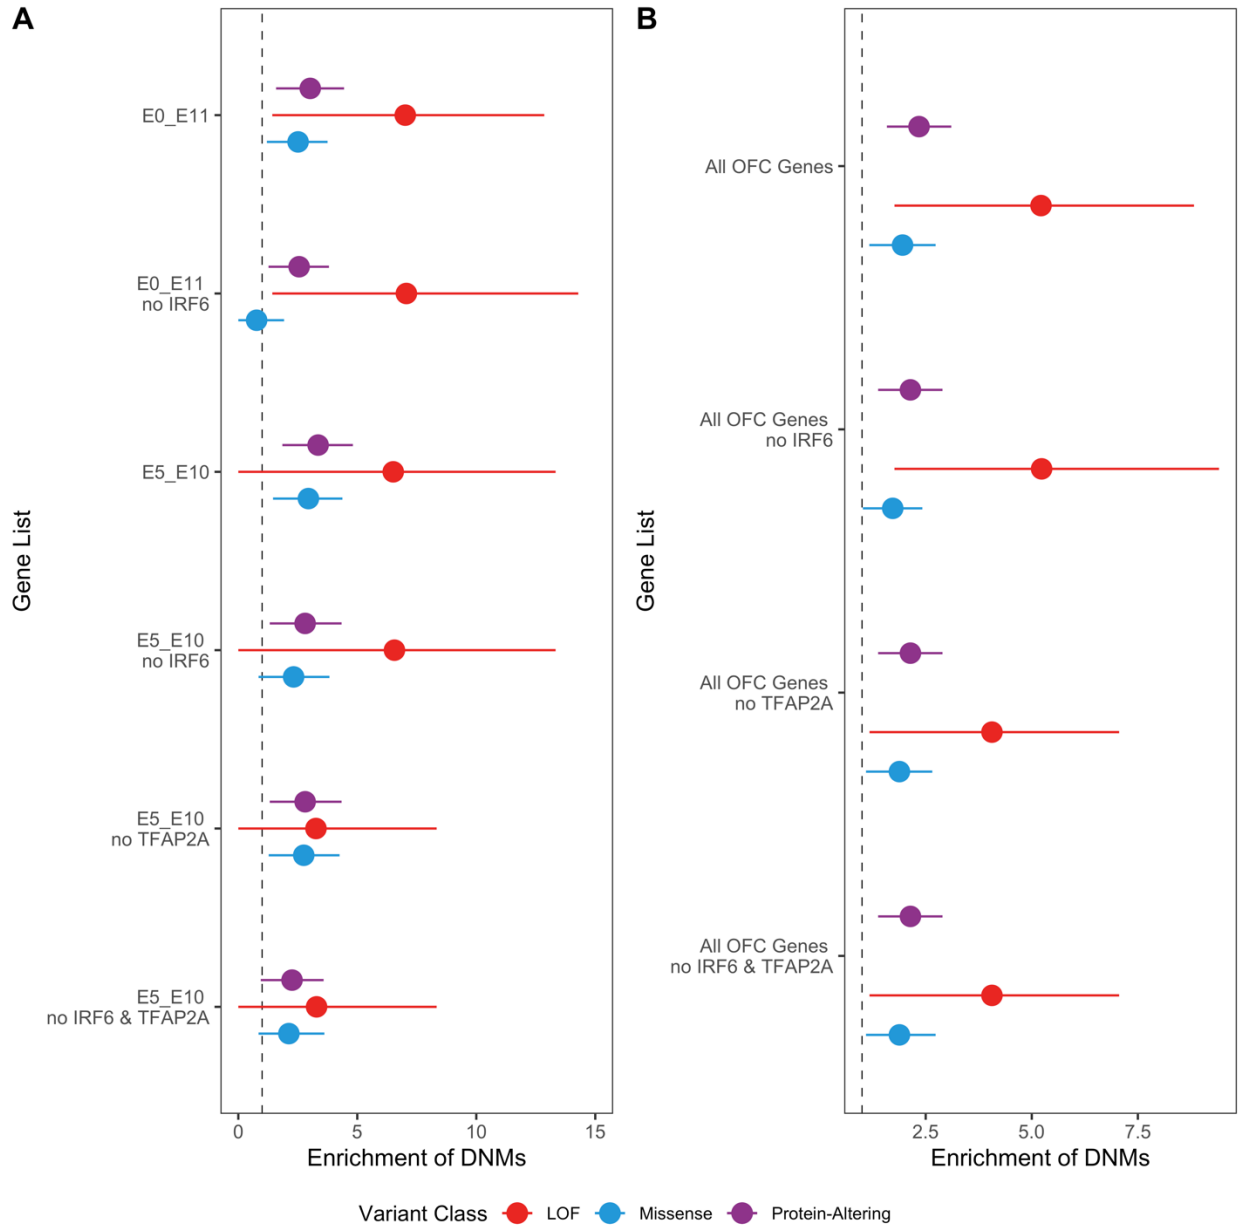

**Figure S8. Sensitivity analysis for *IRF6* and *TFAP2A*.** (A) Enrichment of DNMs  $\pm$  two standard errors for marker genes with and without *IRF6* and/or *TFAP2A* for each significant cell sub-clusters. (B) Enrichment of DNMs  $\pm$  two standard errors for all OFC genes in clinically relevant gene set related to OFC conditions  $\pm$  two standard errors for all OFC genes in clinically relevant gene set related to OFC conditions with and without *IRF6* and/or *TFAP2A*

| Sample           | Total Trios | Trios with no affected parents | Trios with 1 affected parent | Trios with 2 affected parents | Offspring cleft status |      |        |         |      |        |
|------------------|-------------|--------------------------------|------------------------------|-------------------------------|------------------------|------|--------|---------|------|--------|
|                  |             |                                |                              |                               | CL/P                   |      |        | CP only |      |        |
|                  |             |                                |                              |                               | Total                  | Male | Female | Total   | Male | Female |
| <b>European</b>  | 373         | 331                            | 38                           | 4                             | 315                    | 209  | 106    | 58      | 32   | 26     |
| <b>Colombian</b> | 267         | 267                            | 0                            | 0                             | 267                    | 156  | 111    | 0       | 0    | 0      |
| <b>Taiwanese</b> | 116         | 108                            | 8                            | 0                             | 116                    | 79   | 37     | 0       | 0    | 0      |
| <b>Total</b>     | 756         | 706                            | 46                           | 4                             | 698                    | 444  | 254    | 58      | 32   | 26     |

**Table S1.** Summary of the GMKF sample of case-parent trios with OFCs.

| Variant Class                   | Variant Class Subclassification | Colombian CL/P (N) |         |         | European CL/P (N) |         |         | Euro. CP (N) | Taiwanese CL/P (N) |           |        | All CL/P (N) |           |         | All OFC (N) |           |         |
|---------------------------------|---------------------------------|--------------------|---------|---------|-------------------|---------|---------|--------------|--------------------|-----------|--------|--------------|-----------|---------|-------------|-----------|---------|
|                                 |                                 | All (267)          | M (156) | F (111) | All (315)         | M (210) | F (105) |              | All (58)           | All (116) | M (79) | F (37)       | All (698) | M (445) | F (253)     | All (756) | M (477) |
| Loss of Function                | Total                           | 41                 | 25      | 16      | 42                | 25      | 17      | 7            | 12                 | 10        | 2      | 95           | 60        | 35      | 102         | 62        | 40      |
|                                 | Stopgain                        | 15                 | 8       | 7       | 17                | 10      | 7       | 4            | 2                  | 2         | 0      | 34           | 20        | 14      | 38          | 21        | 17      |
|                                 | Frameshifting indel             | 18                 | 10      | 8       | 18                | 10      | 8       | 1            | 9                  | 7         | 2      | 45           | 27        | 18      | 46          | 27        | 19      |
|                                 | Splice                          | 8                  | 7       | 1       | 7                 | 5       | 2       | 2            | 1                  | 1         | 0      | 16           | 13        | 3       | 18          | 14        | 4       |
|                                 | Loss of Function pLI:0.995-1    | 10                 | 9       | 1       | 8                 | 3       | 5       | 4            | 3                  | 3         | 0      | 21           | 15        | 6       | 25          | 17        | 8       |
|                                 | Loss of Function pLI: 0.5-0.995 | 11                 | 4       | 7       | 5                 | 3       | 2       | 0            | 2                  | 2         | 0      | 18           | 9         | 9       | 18          | 9         | 9       |
|                                 | Loss of Function pLI: 0-0.5     | 20                 | 12      | 8       | 29                | 19      | 10      | 3            | 7                  | 5         | 2      | 56           | 36        | 20      | 59          | 36        | 23      |
| <b>Non-frameshifting indels</b> |                                 | 12                 | 9       | 3       | 12                | 8       | 4       | 0            | 9                  | 4         | 5      | 33           | 21        | 12      | 33          | 21        | 12      |
| Missense                        | Total                           | 201                | 118     | 83      | 194               | 133     | 61      | 51           | 76                 | 55        | 21     | 471          | 306       | 165     | 522         | 333       | 189     |
|                                 | MPC>2                           | 15                 | 8       | 7       | 12                | 9       | 3       | 5            | 9                  | 6         | 3      | 36           | 23        | 13      | 41          | 27        | 14      |
|                                 | MPC: 1-2                        | 20                 | 13      | 7       | 36                | 23      | 13      | 5            | 10                 | 7         | 3      | 66           | 43        | 23      | 71          | 47        | 24      |
|                                 | MPC:0-1                         | 148                | 88      | 60      | 129               | 90      | 39      | 38           | 50                 | 38        | 12     | 327          | 216       | 111     | 365         | 233       | 132     |
|                                 | Unknown                         | 18                 | 9       | 9       | 17                | 11      | 6       | 3            | 7                  | 4         | 3      | 42           | 24        | 18      | 45          | 26        | 19      |
| <b>Synonymous</b>               |                                 | 76                 | 49      | 27      | 75                | 56      | 19      | 16           | 38                 | 26        | 12     | 189          | 131       | 58      | 205         | 135       | 70      |
| <b>Protein-altering</b>         |                                 | 254                | 152     | 102     | 248               | 166     | 82      | 58           | 97                 | 69        | 28     | 599          | 387       | 212     | 657         | 416       | 241     |
| <b>Total</b>                    |                                 | 330                | 201     | 129     | 323               | 222     | 101     | 74           | 135                | 95        | 40     | 788          | 518       | 270     | 862         | 551       | 311     |

**Table S2.** Summary of DNMs identified the GMKF sample of case-parent trios with OFCs.

| Species | Primer    | Sequence                                                 |
|---------|-----------|----------------------------------------------------------|
| Mouse   | Irf2bp1 F | GCTTCAAGTACCTCGAGTATG                                    |
| Mouse   | Irf2bp1 R | <u>CGATGTTAATACGACTCACTATAGGG</u> TGATGTCACCAGCAAGAATAG  |
| Mouse   | Macf1 F   | CTTACAACAGGAGACAGAGAAG                                   |
| Mouse   | Macf1 R   | <u>CGATGTTAATACGACTCACTATAGGG</u> TAGAGTGGAGAGTGGTGTATC  |
| Mouse   | Rbm15 F   | AACGCTTCGGTGATGTAAG                                      |
| Mouse   | Rbm15 R   | <u>CGATGTTAATACGACTCACTATAGGG</u> GGCCTCTTAATGTCCACTTC   |
| Mouse   | Setd2 F   | AGTCCTCCGTCAGGAATAAG                                     |
| Mouse   | Setd2 R   | <u>CGATGTTAATACGACTCACTATAGGG</u> GGAGTCGGTTTCTTGGAATAC  |
| Mouse   | Sox2 F    | GAAGGATAAGTACACGCTTCC                                    |
| Mouse   | Sox2 R    | <u>CGATGTTAATACGACTCACTATAGGG</u> GCGTTAATTTGGATGGGATTG  |
| Mouse   | Zfx3 F    | ACAGCGCAACAGGAATAG                                       |
| Mouse   | Zfx3 R    | <u>CGATGTTAATACGACTCACTATAGGG</u> GATACGTGGTAGGAAGGTTAAG |
| Mouse   | Zfx4 F    | CTTGACCGGGAGAAAGATTAC                                    |
| Mouse   | Zfx4 R    | <u>CGATGTTAATACGACTCACTATAGGG</u> GTTTGATAGCCTCCGATTCC   |

**Table S5.** Summary of gene-specific ISH riboprobe primers used for in situ hybridization.
